# Supplementary material
Source: PubMed Central journal article supplement (PMC2941281)
Supplement: 1002696107_pnas.201002696SI.pdf [file 1002696107_pnas.201002696SI.pdf]

# Supporting Information

Mariño et al. 10.1073/pnas.1002696107

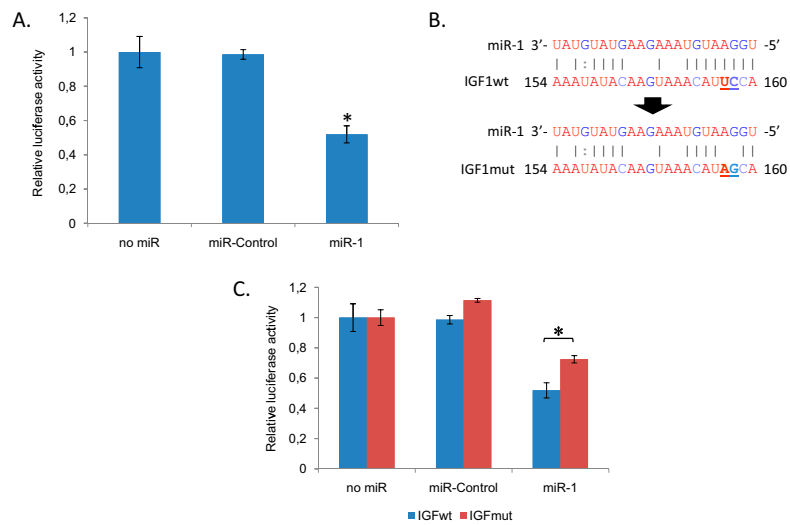

**Fig. S1.** The 3'-UTR of mouse *IGF-1* presents a functional binding site for miR-1. (A) The 3'-UTR of mouse *IGF-1* was cloned downstream the ORF of Renilla luciferase, and the plasmid was transfected alone or together with a control miR or miR-1 precursor molecules. Renilla luciferase activity was measured 18 h later, and data were normalized against firefly luciferase activity. (B) Pairwise alignment between miR-1 and the WT and mutated 3'-UTR of *IGF-1* (IGF-1mut), in which bases at positions 3 and 4 of the seed region were mutated (underlined bases). (C) Luciferase assays using the WT (blue bars) or mutated (red bars) 3'-UTR of mouse *IGF-1* alone or together with a control miR or miR-1 precursor molecules. All of the experiments were carried out in triplicate.
